# Supplementary material for: Attenuation of Heparan Sulfate Proteoglycan Binding Enhances In Vivo Transduction of Human Primary Hepatocytes with AAV2
Source: Mol Ther Methods Clin Dev. 2020 May 13;17:1139–54. doi: 10.1016/j.omtm.2020.05.004 (PMC7260615; doi:10.1016/j.omtm.2020.05.004)
Supplement: Document S1. Figures S1–S26, Tables S1–S5, and Supplemental Materials and Methods [file mmc1.pdf]

## **Supplemental Information**

### **Attenuation of Heparan Sulfate Proteoglycan**

### **Binding Enhances *In Vivo* Transduction**

### **of Human Primary Hepatocytes with AAV2**

**Marti Cabanes-Creus, Adrian Westhaus, Renina Gale Navarro, Grober Baltazar, Erhua Zhu, Anais K. Amaya, Sophia H.Y. Liao, Suzanne Scott, Erwan Sallard, Kimberley L. Dilworth, Arkadiusz Rybicki, Matthieu Drouyer, Claus V. Hallwirth, Antonette Bennett, Giorgia Santilli, Adrian J. Thrasher, Mavis Agbandje-McKenna, Ian E. Alexander, and Leszek Lisowski**

**Supplementary Figure S1.** DNA (A) and protein (B) sequence alignments of AAV2 and AAV-NP59. Structural clusters corresponding to residues described at Supplementary Table 1 are defined.

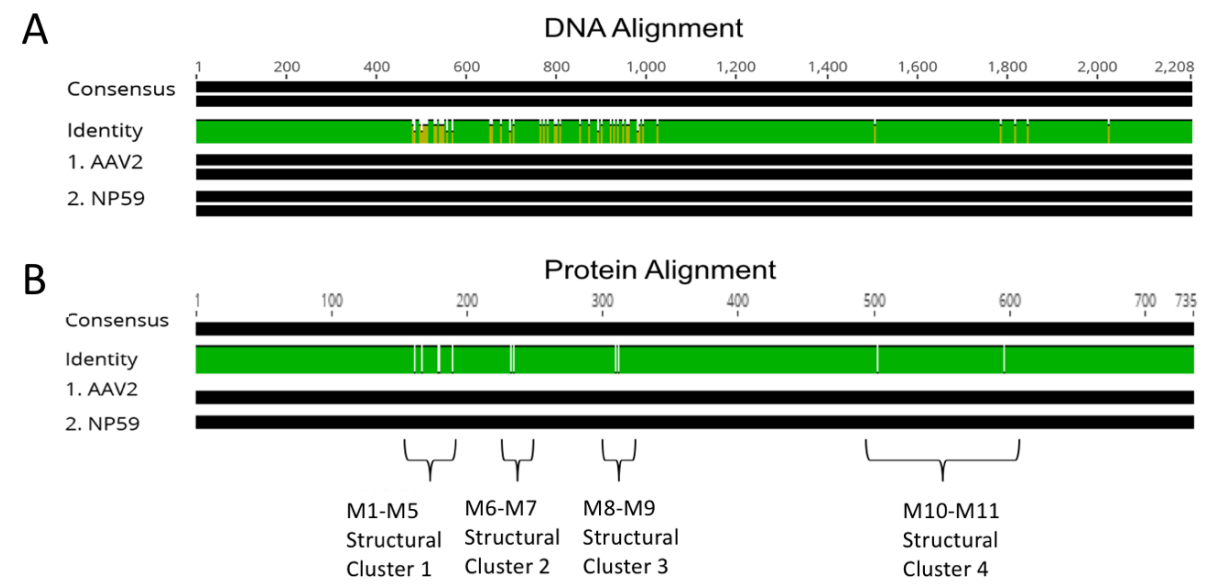

**Supplementary Figure S2.** AAV yield comparison from five independent crude productions using helper plasmids encoding for AAV2, AAV-NP59 and AAV2.V59.

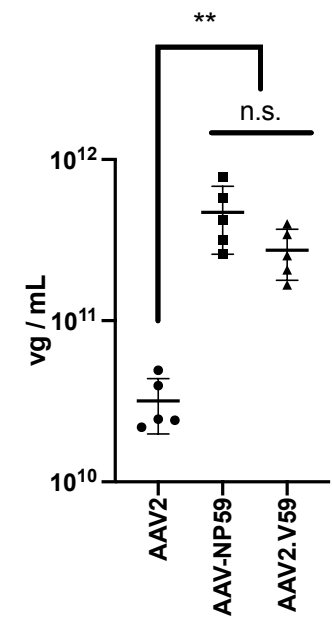

**Supplementary Figure S3.** Expected (orange) and observed (green) distributions of theoretical and fully sequenced (n=27) variants, respectively, of the binary capsid library AAV2<sup>Lib2048</sup>. Accumulated mutations refer to total number of residue differences between the studied clone and AAV2. Out of the 2048 library variants, we expected only one to harbour 0 (AAV2) and one to harbour 11 (AAV2.V59).

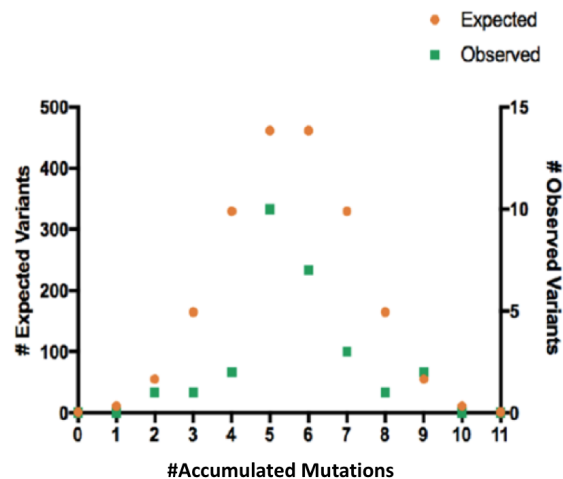

**Supplementary Figure S4.** Schematic representation of Entry and Expression Indexes exemplified with the study of two capsids. AAV capsid variants are individually packaged with five barcodes at increasing concentration (Capsid 1, BC1-5; Capsid 2, BC6-10). This results in a corresponding viral population at respective concentrations of barcodes. Both preparations are then individually titrated, mixed at 1:1 ratio (Viral mix) and co-injected into a single hFRG mouse. One week after injection, the chimeric liver is perfused and murine and human cells FACS sorted for DNA and RNA extraction. The barcoded region is then analysed on the initial viral mix, the DNA population and the RNA (cDNA) populations. For each barcode, the entry index corresponds to the quotient between the DNA reads and the viral mix, and the expression between the corresponding cDNA and DN mapped reads.

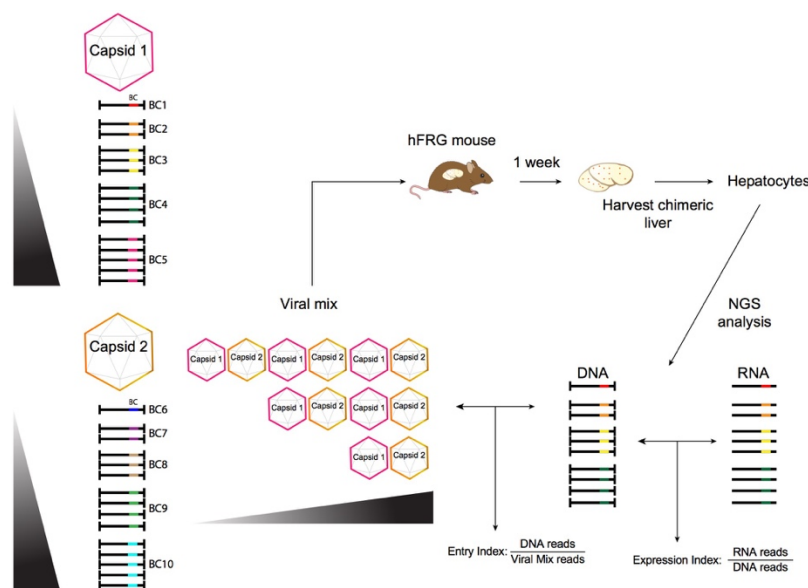

**Supplementary Figure S5.** Demultiplexed reads mapped to each cluster variant at Entry (A) and Expression (B) on human hepatocytes. Data pooled by cluster four origin can be found on Fig. 2D-E. (C) Entry index on murine cells sorted from the same hFRG. AAV2 variants are coloured according to Cluster 4 origin (aa 503, aa 596), yellow = AAV2 origin, salmon = AAV2.V59 origin.

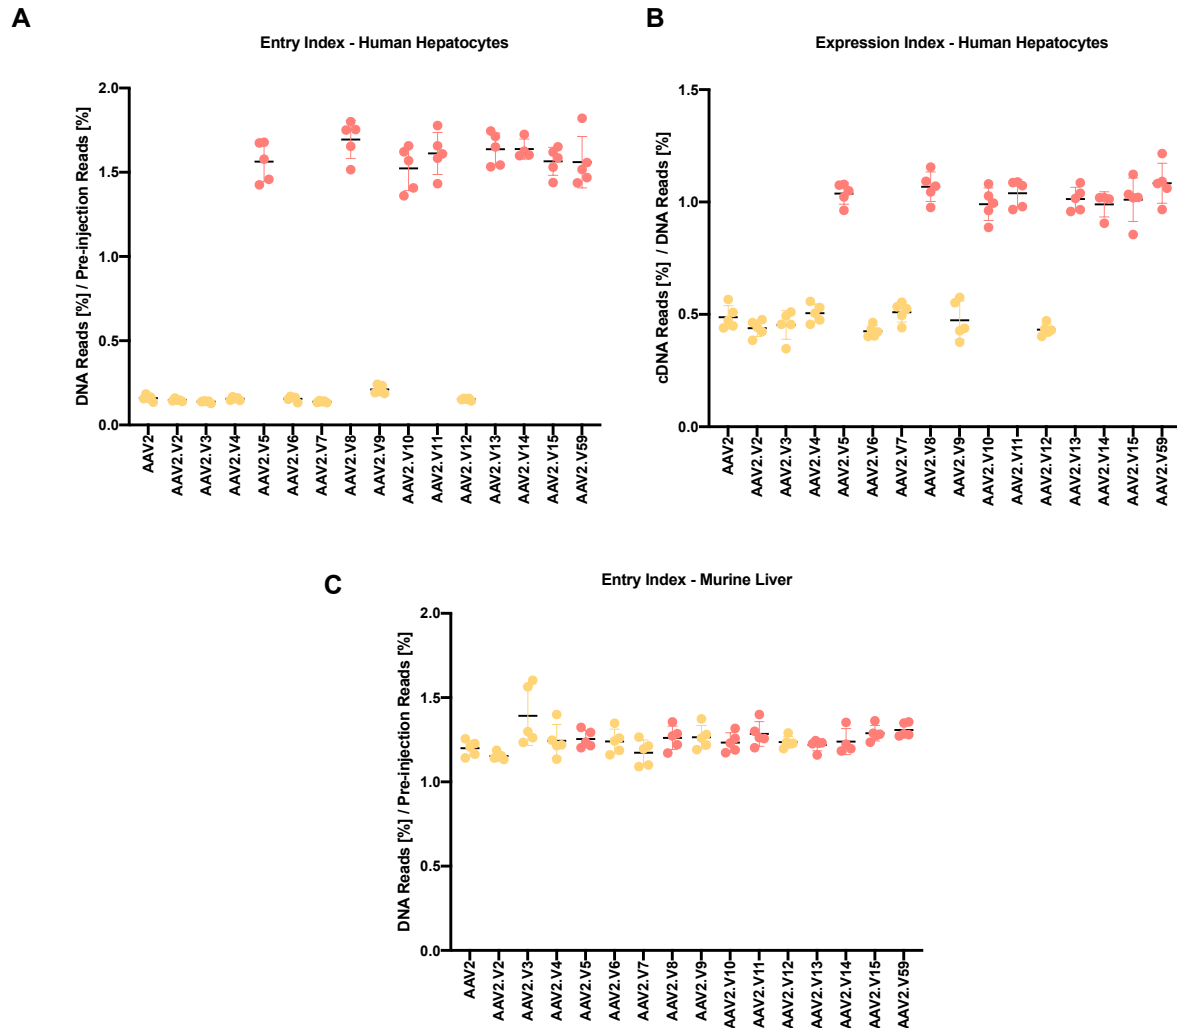

**Supplementary Figure S6.** (A) Relation between DNA read share (%) and RNA Read share (%) of listed AAV2-like variants harbouring T503 and N596 residues. (B) Similar relation of listed AAV2.V59-like variants, all harbouring A503 and D596 residues. The slope (0.4546 for AAV2-like and 1.046 for AAV2.V59-like variants) indicates relative vector transcription rate.

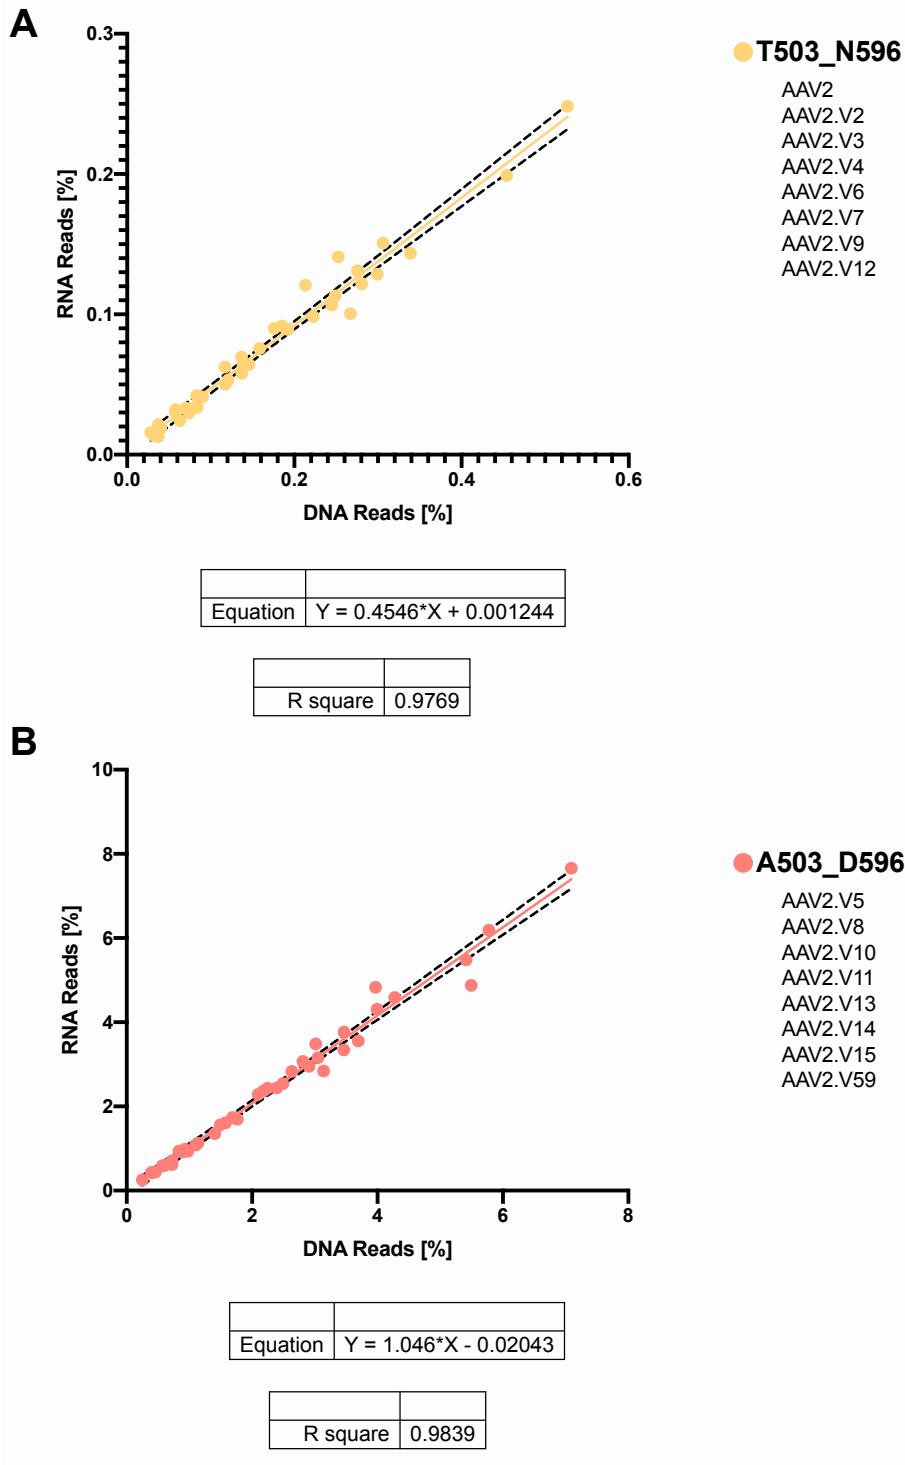

**Supplementary Figure S7.** HiTrap Heparin Column Binding assay of AAV2 Chromatography profile with the pooled fractions in the flow through (cyan) and elution (magenta) that were quantified by qPCR (A) and SDS-PAGE/Silver Staining of pre-loaded preparation (B) and fractions (C).

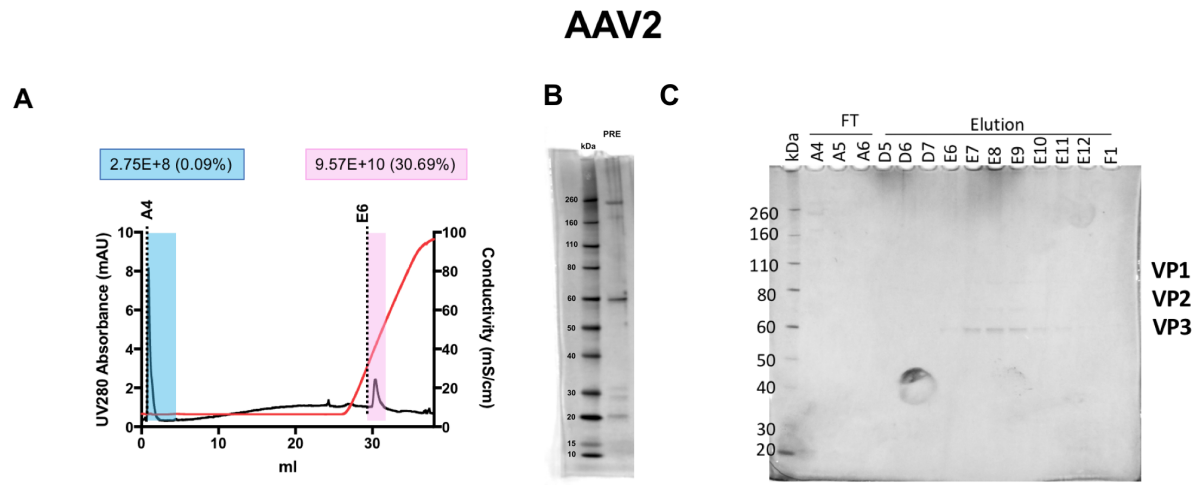

**Supplementary Figure S8.** HiTrap Heparin Column Binding assay of AAV2.V5 (a) Chromatography profile with the pooled fractions in the flow through (cyan) and elution (magenta) that were quantified by qPCR (a) and SDS-PAGE/Silver Staining (b).

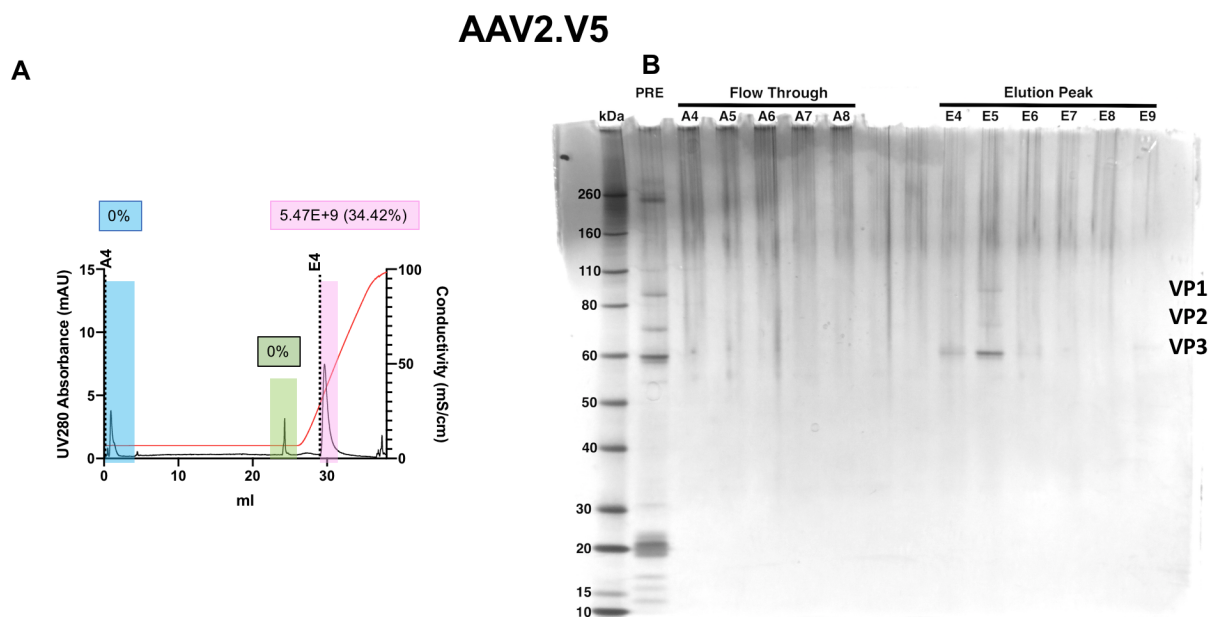

**Supplementary Figure S9.** HiTrap Heparin Column Binding assay of AAV2.V12 (a) Chromatography profile with the pooled fractions in the flow through (cyan) and elution (magenta) that were quantified by qPCR (a) and SDS-PAGE/Silver Staining (b).

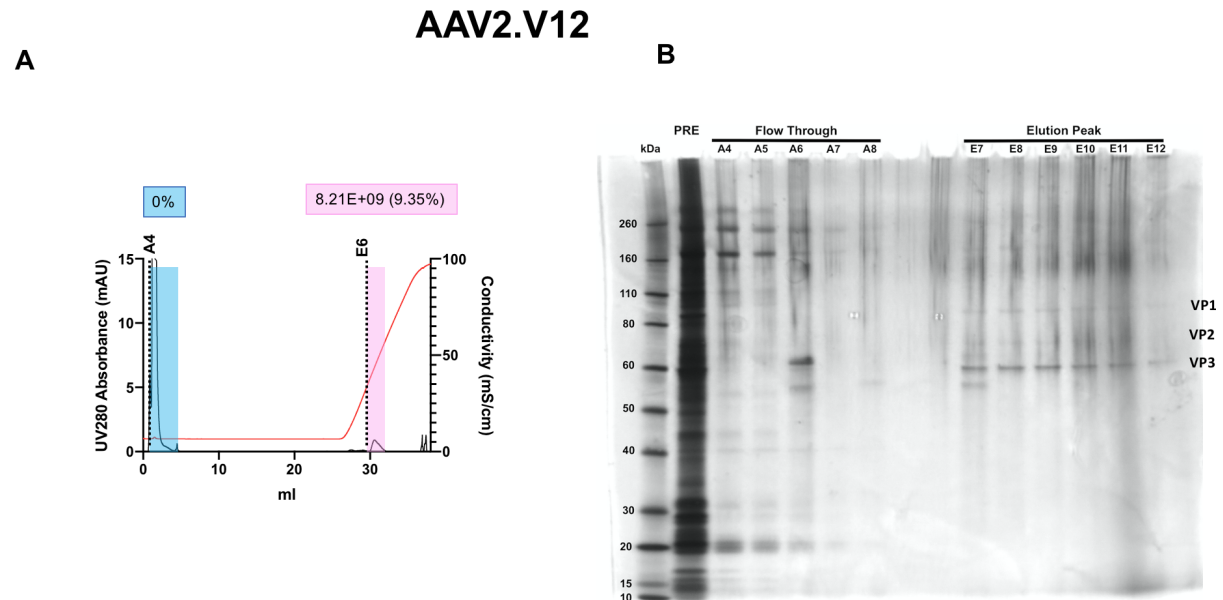

**Supplementary Figure S10.** HiTrap Heparin Column Binding assay of AAV2.V59 (a) Chromatography profile with the pooled fractions in the flow through (cyan) and elution (magenta) that were quantified by qPCR (a) and SDS-PAGE/Silver Staining (b).

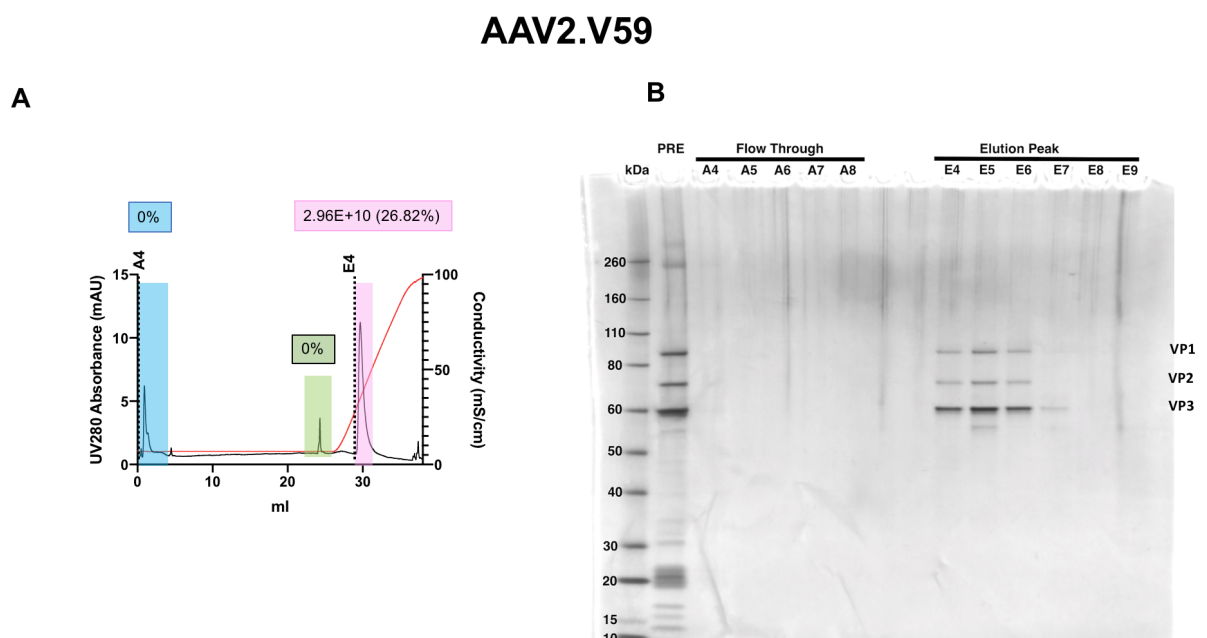

**Supplementary Figure S11.** HuH-7 transduction efficiency at 5,000 MOI (vg / cell) of n=8 AAV2-like clusters (harbouring amino acids T503 and N596) and n=8 AAV2.V59-like variants harbouring T503A and N596D mutations.

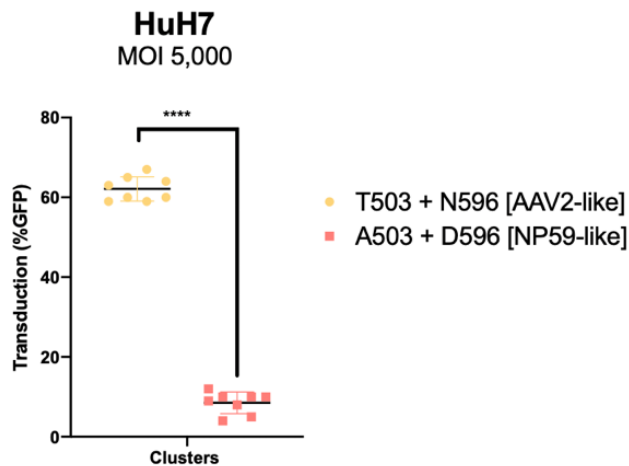

**Supplementary Figure S12.** *In vitro* heparin competition assay using HuH-7 cells transduced with AAV2, AAV2.V5, AAV2.V12 and AAV2.V59 expressing GFP, with and without soluble heparin (100  $\mu$ g / mL, S12A-B, 400  $\mu$ g / mL, S12C-D). Results expressed as a fold-reduction relative to the non-heparin condition at both percentage of GFP positive cells and mean fluorescence intensity (MFI).

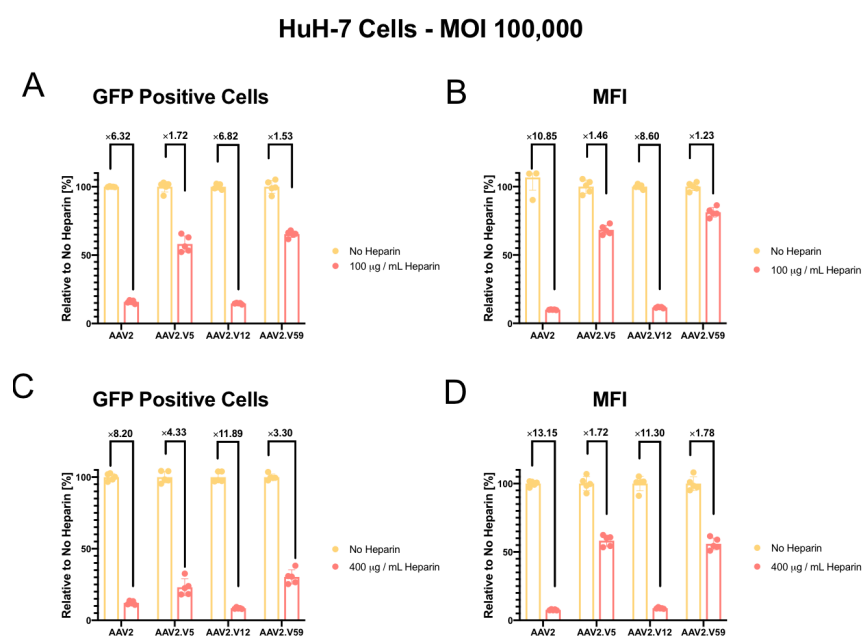

**Supplementary Figure S13.** Viral overlay assay. HuH-7 membrane proteins were incubated with indicated rAAV vectors at  $5 \times 10^{11}$  vg/mL. Membrane was then incubated with an anti-intact AAV2 A20 antibody and horseradish peroxidase (HRP)-conjugated secondary antibody was used then to detect signal. Membrane was then stripped and incubated with Anti-KIAA0319L (AAV-R) (Abcam, AB105385) at 1:400 dilution and signal was detected as described before.

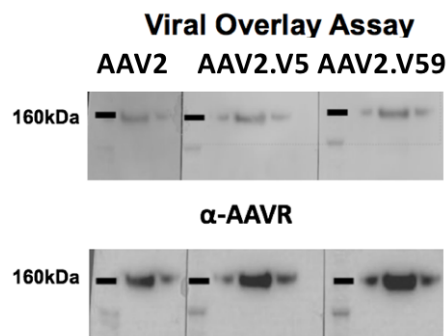

**Supplementary Figure S14.** AAV yield comparison from five independent crude productions using helper plasmids encoding for AAV2 variants V2-V15 and AAV2.V59. Vector yields are grouped by Cluster 4 origin (AAV2-like, T503 + N596; AAV-NP59 like, A503 + D596).

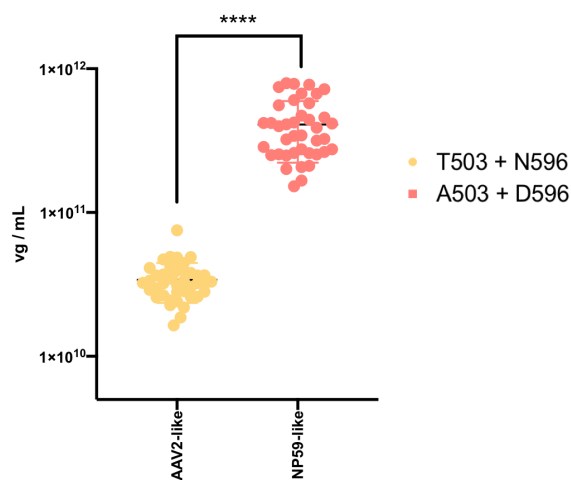

**Supplementary Figure S15. (A)** Next-generation sequencing reads (%) mapped to either the original AAV2 amino acid (yellow) or to the detected variant with increased representation at each specific AAV2 position (VP1 numbering). Frequency depicted for both the vector library and Round 4 of selection. **(B)** Entry index for sorted murine cells (DNA reads (%) / Pre-injection Reads (%)).

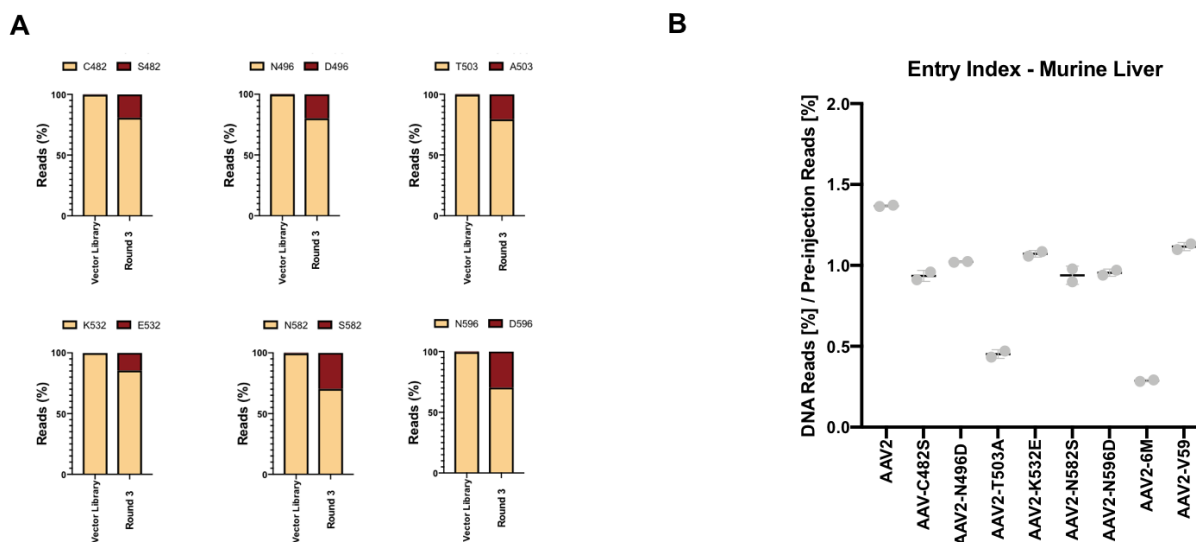

**Supplementary Figure S16. HiTrap Heparin Column Binding assay of AAV2-N496D (a)** Chromatography profile with the pooled fractions in the flow through (cyan) and elution (magenta) that were quantified by qPCR (a) and SDS-PAGE/Silver Staining (b).

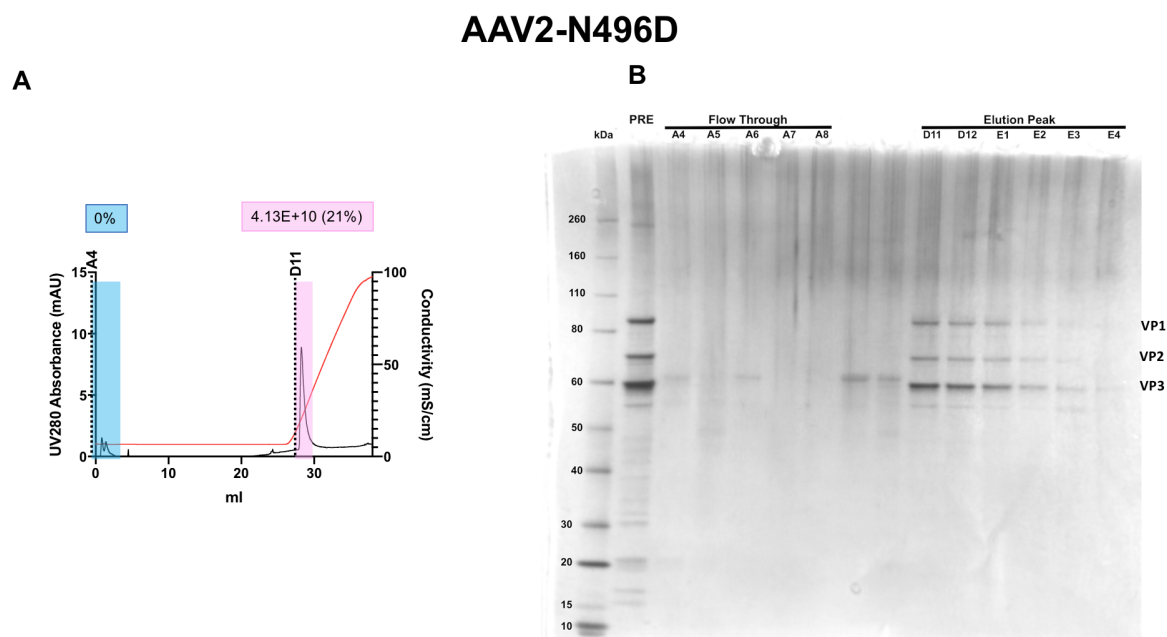

**Supplementary Figure S17.** HiTrap Heparin Column Binding assay of AAV2-N582S (a) Chromatography profile with the pooled fractions in the flow through (cyan) and elution (magenta) that were quantified by qPCR (a) and SDS-PAGE/Silver Staining (b).

### AAV2-N582S

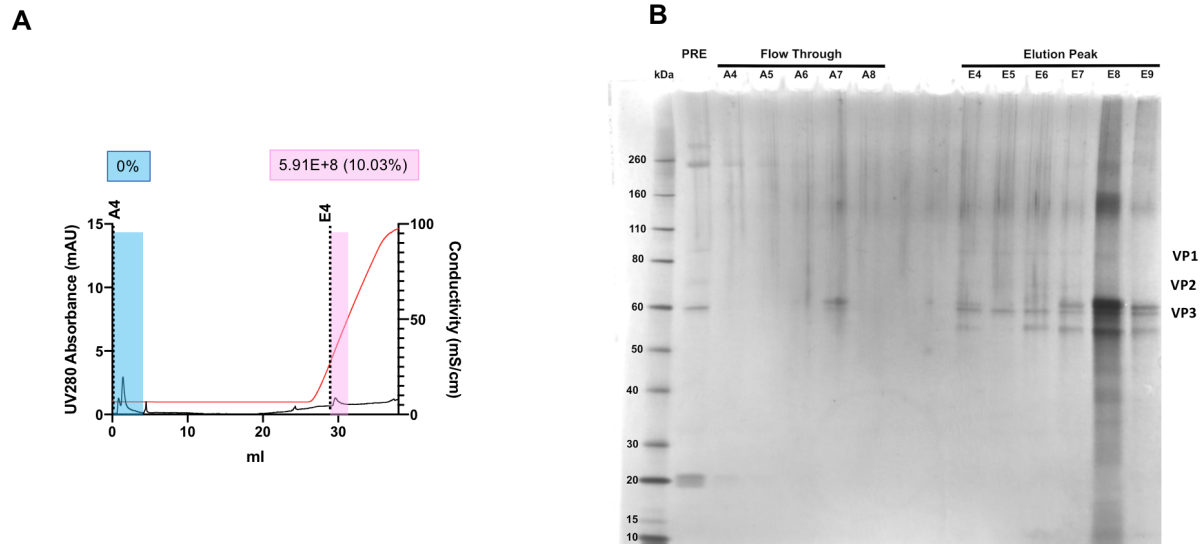

**Supplementary Figure S18.** HiTrap Heparin Column Binding assay of AAV2-K532E (a) Chromatography profile with the pooled fractions in the flow through (cyan) and elution (magenta) that were quantified by qPCR (a) and SDS-PAGE/Silver Staining (b).

### AAV2-K532E

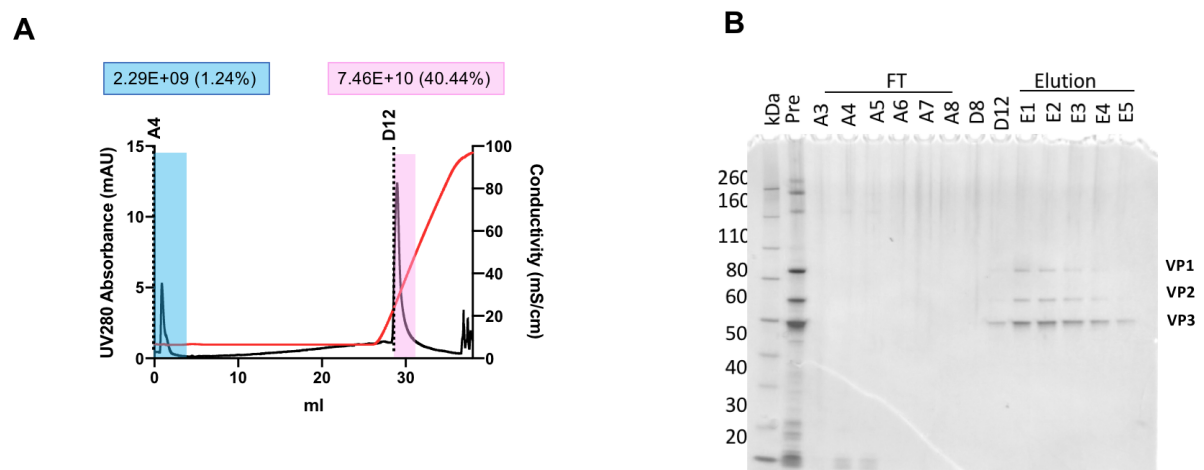

**Supplementary Figure S19.** HiTrap Heparin Column Binding assay of AAV2-6M (a) Chromatography profile with the pooled fractions in the flow through (cyan) and elution (magenta) that were quantified by qPCR (a) and SDS-PAGE/Silver Staining (b).

## AAV2-6M

**A**

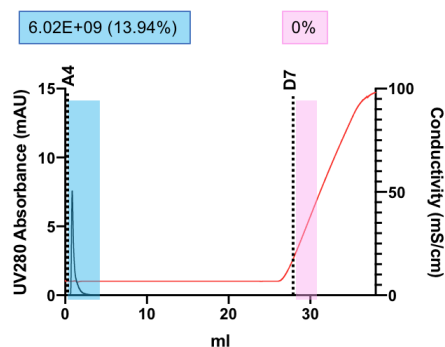

**B**

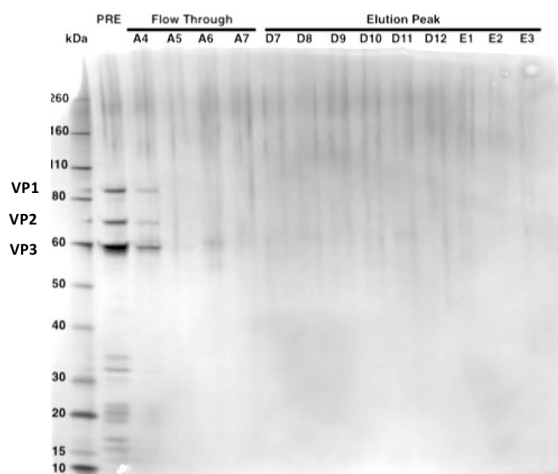

**Supplementary Figure S20.** HiTrap Heparin Column Binding assay of AAV8 (a) Chromatography profile with the pooled fractions in the flow through (cyan) and elution (magenta) that were quantified by qPCR (a) and SDS-PAGE/Silver Staining (b).

## AAV8

**A**

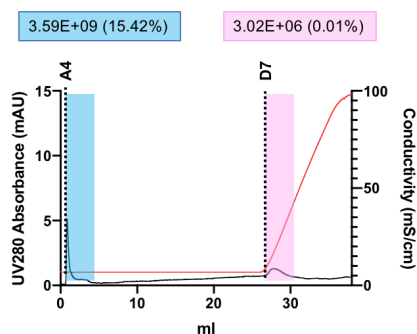

**B**

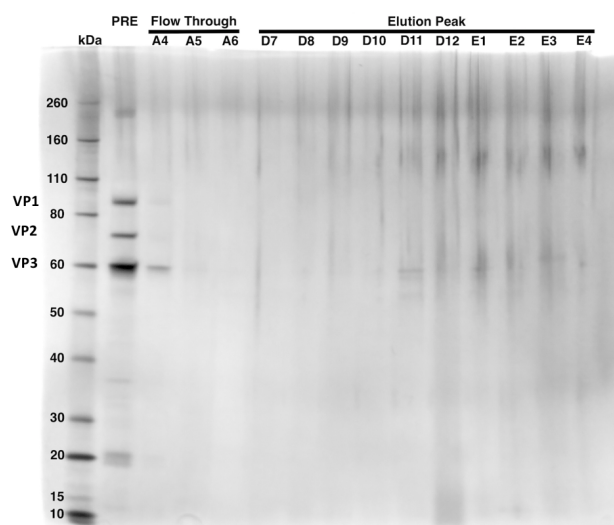

**Supplementary Figure S21.** HiTrap Heparin Column Binding assay of AAV8-E533K (a) Chromatography profile with the pooled fractions in the flow through (cyan) and elution (magenta) that were quantified by qPCR (a) and SDS-PAGE/Silver Staining (b).

### AAV8-E533K

**A**

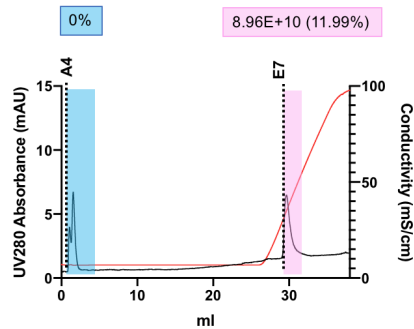

**B**

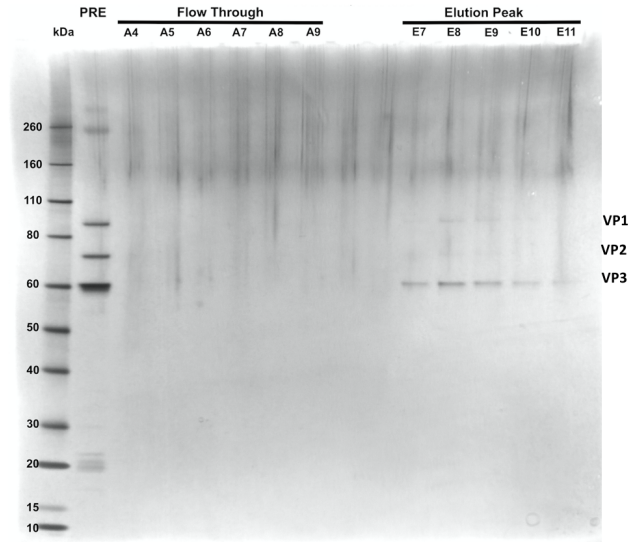

**Supplementary Figure S22.** HiTrap Heparin Column Binding assay of AAV8-RQNR (a) Chromatography profile with the pooled fractions in the flow through (cyan) and elution (magenta) that were quantified by qPCR (a) and SDS-PAGE/Silver Staining (b).

### AAV8-RQNR

**A**

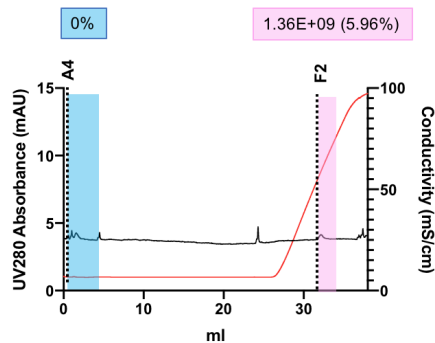

UV280 Transformed  $y=y+4$

**B**

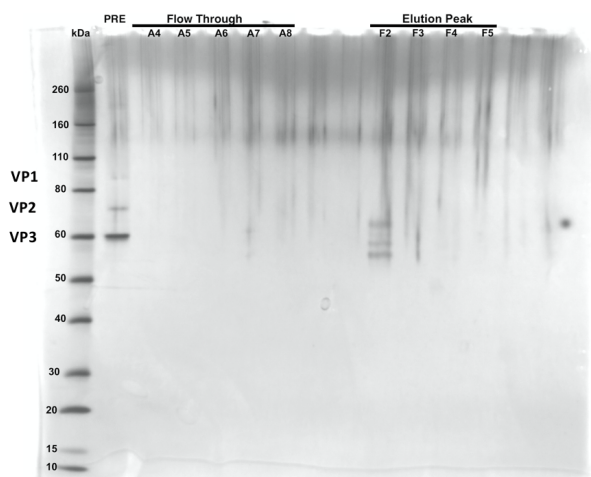

**Supplementary Figure S23.** HiTrap Heparin Column Binding assay of AAV8-E533K-N499D Chromatography profile with the pooled fractions in the flow through (cyan) and elution (magenta) that were quantified by qPCR (A) and SDS-PAGE/Silver Staining of pre-loaded preparation (B) and fractions (C).

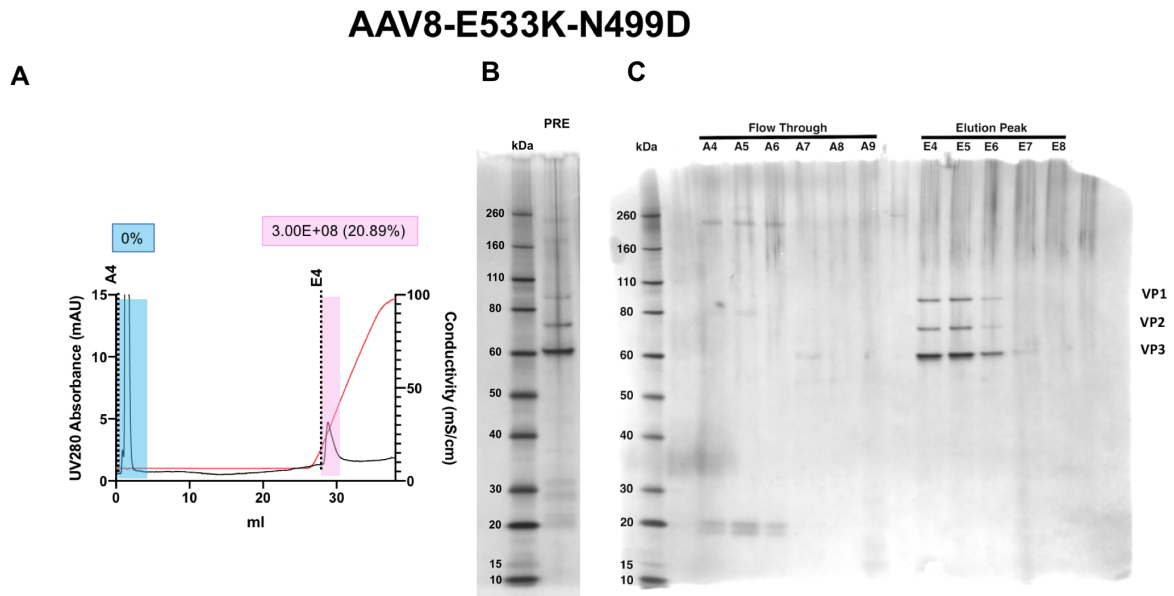

**Supplementary Figure S24.** HiTrap Heparin Column Binding assay of AAV8-RQNR-N499D (a) Chromatography profile with the pooled fractions in the flow through (cyan) and elution (magenta) that were quantified by qPCR (a) and SDS-PAGE/Silver Staining (b).

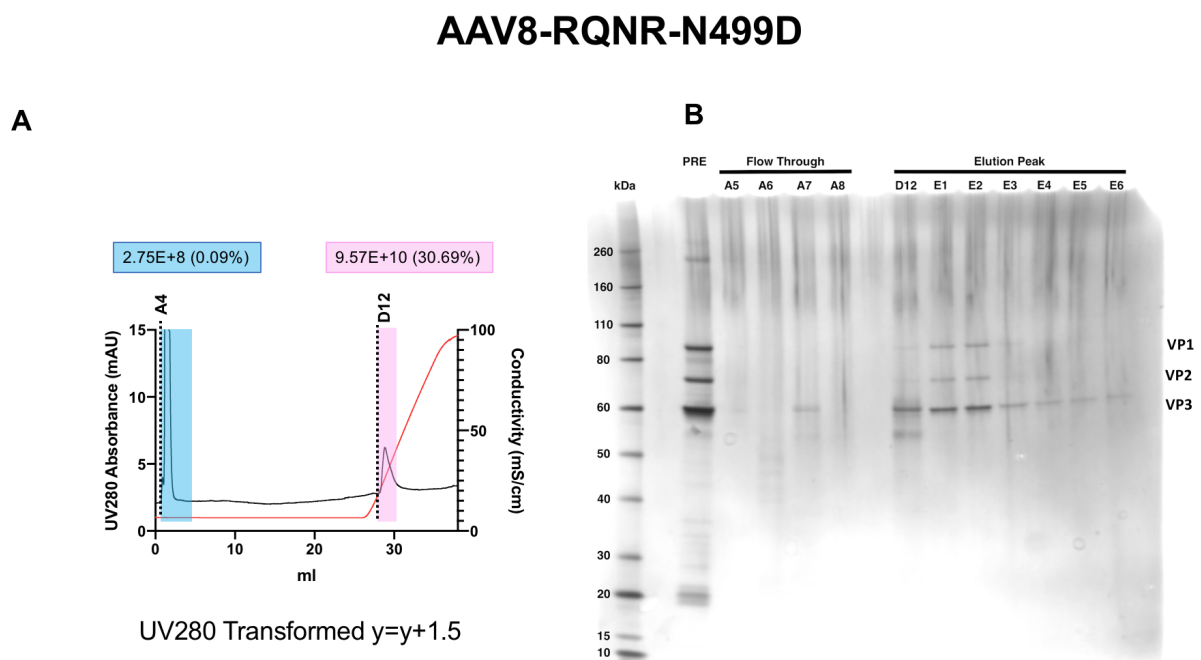

**Supplementary Figure S25.** AAV yield comparison from three independent crude preparations using helper plasmids encoding for AAV8, AAV8-RQNR, AAV8-RQNR-N499D, AAV8-E533K and AAV8-E533K-N499D.

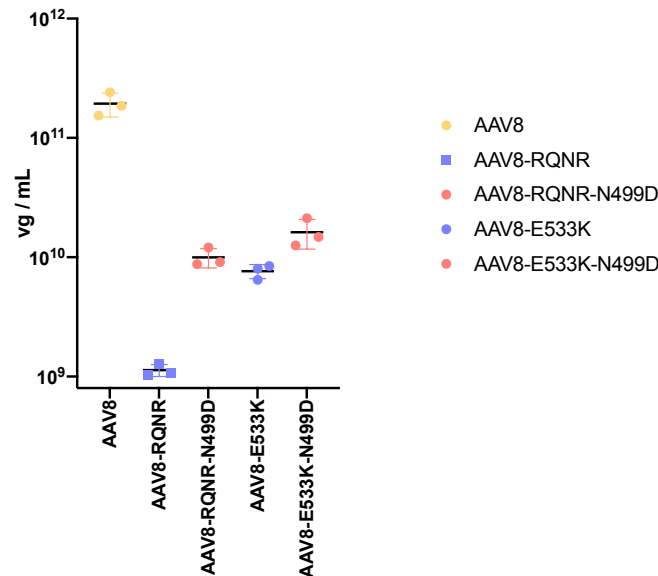

**Supplementary Figure S26.** Gibson Assembly based Construction of library AAV2<sup>Lib2048</sup>. Four AAV2 backbone variants encoding for the full cap ORF were first generated (prototypical AAV2, a T503A variant, a N596D variant and a double mutant). The DNA fragments englobing all the possible combinations corresponding to the first five mutations between AAV2 and NP59 were custom synthesized ( $2^5 = 32$  fragments), as well as the following four ( $2^4 = 16$  fragments). Fragments were individually PCR amplified with overlapping primers and Gibson assembled on an equimolar ratio to the PCR amplified and DpnI treated backbones englobing the four distinct variants ( $2^2 = 4$ ). Thus, the total complexity of the library was expected to be of 2048 variants ( $32 * 16 * 4$ ), equivalent to the permutation of the eleven variable amino acids ( $2^{11} = 2048$ ).

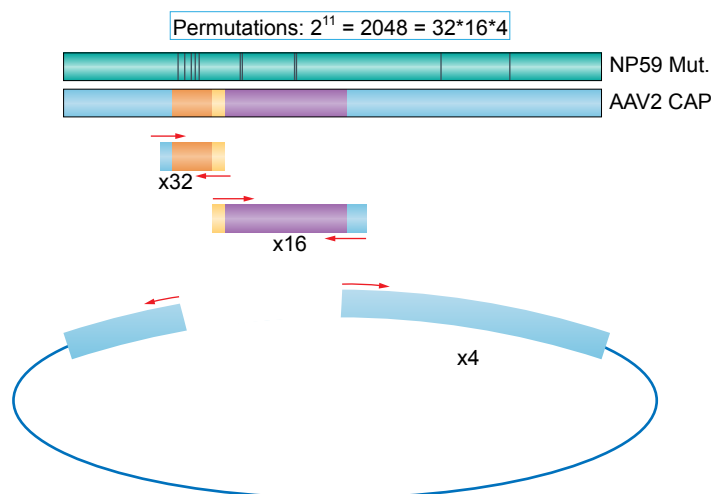

**Supplementary Table ST1.** Eleven amino acid differences between AAV2 and AAV-NP59, corresponding origin on the initial shuffled library and corresponding structural cluster (1-4).

| Mutation # | Position | AAV2 Amino acid | NP59 Amino acid | Probable Origin | Structural Cluster |
|------------|----------|-----------------|-----------------|-----------------|--------------------|
| 1          | 162      | A               | T               | AAV1/AAV6       | 1                  |
| 2          | 168      | R               | K               | AAV1/AAV6       | 1                  |
| 3          | 179      | A               | S               | AAV1/AAV6       | 1                  |
| 4          | 180      | D               | E               | AAV1/AAV6       | 1                  |
| 5          | 190      | Q               | E               | AAV3            | 1                  |
| 6          | 233      | T               | Q               | AAV3            | 2                  |
| 7          | 235      | M               | L               | AAV3            | 2                  |
| 8          | 310      | R               | K               | AAV3            | 3                  |
| 9          | 312      | N               | S               | AAV3            | 3                  |
| 10         | 503      | T               | A               | Point Mutation  | 4                  |
| 11         | 596      | N               | D               | Point Mutation  | 4                  |

**Supplementary Table ST2.** Raw viral mix NGS read counts and percentage (%) mapped to each capsid (n=5 BC / capsid) at increasing concentration. For variant AAV2.V14, barcode A was disregarded for further analysis due to significantly lower concentration than barcode A population average (thus n=4 BC / capsid for AAV2.V14).

|        |       |      |       |       |      |       |       |      |       |       |      |       |       |      |       |       |      |
|--------|-------|------|-------|-------|------|-------|-------|------|-------|-------|------|-------|-------|------|-------|-------|------|
| AAV2_A | 4161  | 0.24 | 2_2A  | 5078  | 0.29 | 2_3A  | 4518  | 0.26 | 2_3A  | 4518  | 0.26 | 2_4A  | 4448  | 0.25 | 2_5A  | 3061  | 0.17 |
| AAV2_B | 8679  | 0.49 | 2_2B  | 7924  | 0.45 | 2_3B  | 9500  | 0.54 | 2_3B  | 9500  | 0.54 | 2_4B  | 9018  | 0.51 | 2_5B  | 9104  | 0.52 |
| AAV2_C | 17341 | 0.98 | 2_2C  | 20282 | 1.15 | 2_3C  | 19311 | 1.10 | 2_3C  | 19311 | 1.10 | 2_4C  | 18484 | 1.05 | 2_5C  | 17610 | 1.00 |
| AAV2_D | 17434 | 0.99 | 2_2D  | 30775 | 1.75 | 2_3D  | 28094 | 1.60 | 2_3D  | 28094 | 1.60 | 2_4D  | 26339 | 1.50 | 2_5D  | 28760 | 1.63 |
| AAV2_E | 25698 | 1.46 | 2_2E  | 42042 | 2.39 | 2_3E  | 36951 | 2.10 | 2_3E  | 36951 | 2.10 | 2_4E  | 30108 | 1.71 | 2_5E  | 32654 | 1.85 |
| 2_6A   | 4242  | 0.24 | 2_7A  | 2684  | 0.15 | 2_8A  | 4764  | 0.27 | 2_9A  | 6705  | 0.38 | 2_10A | 4500  | 0.26 | 2_11A | 7286  | 0.41 |
| 2_6B   | 9176  | 0.52 | 2_7B  | 4228  | 0.24 | 2_8B  | 10548 | 0.60 | 2_9B  | 13140 | 0.75 | 2_10B | 11134 | 0.63 | 2_11B | 15941 | 0.91 |
| 2_6C   | 18334 | 1.04 | 2_7C  | 10415 | 0.59 | 2_8C  | 13622 | 0.77 | 2_9C  | 33071 | 1.88 | 2_10C | 18640 | 1.06 | 2_11C | 35165 | 2.00 |
| 2_6D   | 25535 | 1.45 | 2_7D  | 9140  | 0.52 | 2_8D  | 27627 | 1.57 | 2_9D  | 53188 | 3.02 | 2_10D | 31936 | 1.81 | 2_11D | 27591 | 1.57 |
| 2_6E   | 34205 | 1.94 | 2_7E  | 17101 | 0.97 | 2_8E  | 46294 | 2.63 | 2_9E  | 58798 | 3.34 | 2_10E | 42057 | 2.39 | 2_11E | 58246 | 3.31 |
| 2_12A  | 4868  | 0.28 | 2_13A | 9094  | 0.52 | 2_14A | 5     | 0.00 | 2_15A | 5290  | 0.30 | 2_16A | 5994  | 0.34 |       |       |      |
| 2_12B  | 8783  | 0.50 | 2_13B | 21980 | 1.25 | 2_14B | 12086 | 0.69 | 2_15B | 11179 | 0.63 | 2_16B | 12547 | 0.71 |       |       |      |
| 2_12C  | 8975  | 0.51 | 2_13C | 40250 | 2.29 | 2_14C | 25891 | 1.47 | 2_15C | 22072 | 1.25 | 2_16C | 24505 | 1.39 |       |       |      |
| 2_12D  | 27570 | 1.57 | 2_13D | 58625 | 3.33 | 2_14D | 36974 | 2.10 | 2_15D | 31147 | 1.77 | 2_16D | 34615 | 1.97 |       |       |      |
| 2_12E  | 28731 | 1.63 | 2_13E | 79892 | 4.54 | 2_14E | 42509 | 2.41 | 2_15E | 35734 | 2.03 | 2_16E | 58873 | 3.34 |       |       |      |

**Supplementary Table ST3.** Primers used for site-directed mutagenesis of corresponding AAV variants.

| Variant |  | AAV2 T503A              | Sequence                                  |
|---------|--|-------------------------|-------------------------------------------|
| Forward |  | F_AAV2_T503A            | TACTCGTGGGCTGGAGCTACCAAGTAC               |
| Reverse |  | R_AAV2_T503A            | TTCACGTGTGTTGTTATCCGCAGATG                |
| Variant |  | AAV2 N596D              | Sequence                                  |
| Forward |  | F_AAV2_N596D            | CGCAGATGTCAACACACAAGGCG                   |
| Reverse |  | R_AAV2_N596D            | GTAGCTGCTTGTCTGTTGCCTCTCT                 |
| Variant |  | AAV2 C482S              | Sequence                                  |
| Forward |  | F_AAV2_C482S            | GGCTTCCTGGACCCAGTTACCGCCAGCAG             |
| Reverse |  | R_AAV2_C482S            | AGTTCCTAGACTGGTCCCGAATGTC                 |
| Variant |  | AAV2 N496D              | Sequence                                  |
| Forward |  | F_AAV2_N496D            | CATCTGCGGATAACGACAACAGTGAATACTC           |
| Reverse |  | R_AAV2_N496D            | TCTTTGATACTCGCTGCTGGCG                    |
| Variant |  | AAV2 K532E              | Sequence                                  |
| Forward |  | F_AAV2_K532E            | GGACGATGAAGAAGAGTTTTTTCCTCAGAGCG          |
| Reverse |  | R_AAV2_K532E            | TTGTGGCTTGCCATGGCCG                       |
| Variant |  | AAV2 N582S              | Sequence                                  |
| Forward |  | F_AAV2_N582S            | GTTCTGTATCTACCAGCCTCCAGAGAGGCAACAG        |
| Reverse |  | R_AAV2_N582S            | CATACTGCTCCGTAGCCACGGG                    |
| Variant |  | AAV8 E533K              | Sequence                                  |
| Forward |  | F_AAV8_E533K            | ACACAAAGACGACAAGGAGCGTTTTTTTCCCAG         |
| Reverse |  | R_AAV8_E533K            | GTTGCCATAGCGATGCCAGGATTAGCC               |
| Variant |  | AAV8 RQNR               | Sequence                                  |
| Forward |  | F_AAV8_RQNR             | GGCAGATAACTTGCAAGGCAAAACAGGGCTCCTCAAATTGG |
| Reverse |  | R_AAV8_RQNR             | ACGATACCGTATTCCTCTGTAGCCAC                |
| Variant |  | AAV8 E533K/RQNR + N499D | Sequence                                  |
| Forward |  | F_AAV8_N499D            | CGACAACCGGGGCAAAACGACAATAGCAACTTTGCC      |
| Reverse |  | R_AAV8_N499D            | TTGAGACGCGTTGTTGGCGGTAACAGG               |

**Supplementary Table ST4.** Primers.

| Primer Name       | Sequence                                            |
|-------------------|-----------------------------------------------------|
| GFP-qPCR-For      | TCAAGATCCGCCACAACATC                                |
| GFP-qPCR-Rev      | TTCTCGTGGGGTCTTGTCT                                 |
| BC_F              | GCTGGAGTTCGTGACCGCCG                                |
| BC_R              | CAACATAGTTAAGAATACCAGTCAATCTTTCACAAATTTGTAATCCAGAGG |
| human ALB_F ddPCR | TGCTGTCATCTCTTGTGGGCTG                              |
| human ALB_R ddPCR | AACTCATGGGAGCTGCTGGTTC                              |
| Cluster1_F        | TGTGGAGCCAGACTCCTCT                                 |
| Cluster1_R        | GTTCCAGACCAGAGGGGG                                  |
| Cluster2_F        | CACCAATGGCAGACAATAACGAGGG                           |
| Cluster2_R        | GTTGTAGAGGTGGTGTGTAGGTGG                            |
| Cluster3_F        | ATCCACTGCCACTTTTACCAC                               |
| Cluster3_R        | AGGTTATGGCAATCGTCGTCGT                              |
| Cluster4_F        | TCTAGGAAGTGGCTTCCTGGACCC                            |
| Cluster4_R        | CAGATGGGCCCCTGAAGGTACACATC                          |
| CAP Rescue F      | CCCTGCAGACAATGCGAGAGAATGAATCAGAATTCAAATATCTGC       |
| CAP Rescue R      | ATGCATATGGAACTAG ATAAGAAAGAAATACG                   |

**Supplementary Table ST5.** FRG IDs and related information.

| FRG ID | Gender | Age at injection (weeks) | [hAlbumin] at injection (mg/mL) | Experiment                              | Figure |
|--------|--------|--------------------------|---------------------------------|-----------------------------------------|--------|
| 203    | female | 24                       | 4.55                            | AAV2, AAV-NP59, AAV2.V59 comparison     | 1A     |
| 38     | female | 24                       | 7.8                             | Round 1 - FT-2048 Library Selection     | /      |
| 58     | female | 24                       | 6.45                            | Round 2 - FT-2048 Library Selection     | 1D     |
| 316    | female | 24                       | 2.64                            | Round 3 - FT-2048 Library Selection     | /      |
| 235    | female | 24                       | 6.72                            | Round 4 - FT-2048 Library Selection     | 1E-F   |
| 605    | female | 20                       | 0.82                            | AAV2 Clusters - Variants Comparison     | 2C-D   |
| 21     | female | 24                       | 3.22                            | AAV2, AAV2.V59, AAV2.V5 Comparison      | 2E     |
| 36     | female | 24                       | 8                               | Round 1 - FT Library NP59               | /      |
| 56     | female | 24                       | 8.7                             | Round 2 - FT Library NP59               | /      |
| 234    | female | 24                       | 8.55                            | Round 3 - FT Library NP59               | SF 15  |
| 303    | female | 28                       | 0.53                            | AAV2 Point Mutation Variants Comparison | 3C-D   |
| 87     | female | 24                       | 0.204                           | AAV2 IHC                                | 3E-F   |
| 146    | female | 24                       | 0.541                           | AAV2.V59 IHC                            | 3E-F   |
| 29     | female | 24                       | 0.2325                          | AAV2-N496D IHC                          | 3E-F   |
| 128    | female | 24                       | 0.571                           | AAV2-N582S IHC                          | 3E-F   |
| 225    | male   | 20                       | non-engrafted                   | AAV8 IHC                                | 4A     |
| 226    | male   | 20                       | non-engrafted                   | AAV8-E533K IHC                          | 4A     |
| 227    | male   | 20                       | non-engrafted                   | AAV8-RQNR IHC                           | 4A     |
| 272    | male   | 22                       | non-engrafted                   | AAV8 LSP Variants NGS Comparison        | 4B     |
| 216    | male   | 24                       | non-engrafted                   | AAV8 IHC Low Dose                       | 4C     |
| 600    | male   | 23                       | non-engrafted                   | AAV8 IHC High Dose                      | 4C     |
| 602    | male   | 23                       | non-engrafted                   | AAV8-E533K IHC                          | 4C     |
| 603    | male   | 23                       | non-engrafted                   | AAV8-RQNR IHC                           | 4C     |
| 608    | male   | 23                       | non-engrafted                   | AAV8-E533-N499D IHC                     | 4C     |
| 607    | male   | 23                       | non-engrafted                   | AAV8-RQNR-N499D IHC                     | 4C     |

# Statistical analysis

|                                     |                             |
|-------------------------------------|-----------------------------|
| Fig. 2E                             | Entry Index                 |
| Column B                            | A503 + D596 [AAV2_V59-like] |
| vs.                                 | vs.                         |
| Column A                            | T503 + N596 [AAV2-like]     |
| Mann Whitney test                   |                             |
| P value                             | <0.0001                     |
| Exact or approximate P value?       | Exact                       |
| P value summary                     | ****                        |
| Significantly different (P < 0.05)? | Yes                         |
| One- or two-tailed P value?         | Two-tailed                  |
| Sum of ranks in column A,B          | 820 , 2420                  |
| Difference between medians          |                             |
| Median of column A                  | 0.1516, n=40                |
| Median of column B                  | 1.606, n=39                 |
| Difference: Actual                  | 1.454                       |
| Difference: Hodges-Lehmann          | 1.45                        |

|                                     |                             |
|-------------------------------------|-----------------------------|
| Fig. 2F                             | Expression Index            |
| Column B                            | A503 + D596 [AAV2_V59-like] |
| vs.                                 | vs.                         |
| Column A                            | T503 + N596 [AAV2-like]     |
| Mann Whitney test                   |                             |
| P value                             | <0.0001                     |
| Exact or approximate P value?       | Exact                       |
| P value summary                     | ****                        |
| Significantly different (P < 0.05)? | Yes                         |
| One- or two-tailed P value?         | Two-tailed                  |
| Sum of ranks in column A,B          | 820 , 2420                  |
| Difference between medians          |                             |
| Median of column A                  | 0.4561, n=40                |
| Median of column B                  | 1.025, n=39                 |
| Difference: Actual                  | 0.5686                      |
| Difference: Hodges-Lehmann          | 0.5647                      |

|                                     |              |
|-------------------------------------|--------------|
| Fig. 2G                             | AAV2.V59 DNA |
| Column B                            |              |
| vs.                                 | vs.          |
| Column A                            | AAV2 DNA     |
| Mann Whitney test                   |              |
| P value                             | <0.0001      |
| Exact or approximate P value?       | Exact        |
| P value summary                     | ****         |
| Significantly different (P < 0.05)? | Yes          |
| One- or two-tailed P value?         | Two-tailed   |
| Sum of ranks in column A,B          | 45 , 126     |
| Difference between medians          |              |
| Median of column A                  | 0.5714, n=9  |
| Median of column B                  | 5.078, n=9   |
| Difference: Actual                  | 4.507        |
| Difference: Hodges-Lehmann          | 4.451        |

|                                     |             |
|-------------------------------------|-------------|
| Fig. 2G                             | AAV2.V5 DNA |
| Column B                            |             |
| vs.                                 | vs.         |
| Column A                            | AAV2 DNA    |
| Mann Whitney test                   |             |
| P value                             | <0.0001     |
| Exact or approximate P value?       | Exact       |
| P value summary                     | ****        |
| Significantly different (P < 0.05)? | Yes         |
| One- or two-tailed P value?         | Two-tailed  |
| Sum of ranks in column A,B          | 45 , 126    |
| Difference between medians          |             |
| Median of column A                  | 0.5714, n=9 |
| Median of column B                  | 4.832, n=9  |
| Difference: Actual                  | 4.26        |
| Difference: Hodges-Lehmann          | 4.253       |

|                                     |              |
|-------------------------------------|--------------|
| Fig. 2G                             | AAV2.V5 DNA  |
| Column B                            |              |
| vs.                                 | vs.          |
| Column A                            | AAV2.V59 DNA |
| Mann Whitney test                   |              |
| P value                             | 0.3865       |
| Exact or approximate P value?       | Exact        |
| P value summary                     | ns           |
| Significantly different (P < 0.05)? | No           |
| One- or two-tailed P value?         | Two-tailed   |
| Sum of ranks in column A,B          | 96 , 75      |
| Difference between medians          |              |
| Median of column A                  | 5.078, n=9   |
| Median of column B                  | 4.832, n=9   |
| Difference: Actual                  | -0.2468      |
| Difference: Hodges-Lehmann          | -0.1764      |

|                                     |               |
|-------------------------------------|---------------|
| Fig. 2G                             | AAV2.V59 cDNA |
| Column B                            |               |
| vs.                                 | vs.           |
| Column A                            | AAV2 cDNA     |
| Mann Whitney test                   |               |
| P value                             | <0.0001       |
| Exact or approximate P value?       | Exact         |
| P value summary                     | ****          |
| Significantly different (P < 0.05)? | Yes           |
| One- or two-tailed P value?         | Two-tailed    |
| Sum of ranks in column A,B          | 45 , 126      |
| Difference between medians          |               |
| Median of column A                  | 0.1585, n=9   |
| Median of column B                  | 5.217, n=9    |
| Difference: Actual                  | 5.059         |
| Difference: Hodges-Lehmann          | 5.061         |

|                                     |              |
|-------------------------------------|--------------|
| Fig. 2G                             | AAV2.V5 cDNA |
| Column B                            |              |
| vs.                                 | vs.          |
| Column A                            | AAV2 cDNA    |
| Mann Whitney test                   |              |
| P value                             | <0.0001      |
| Exact or approximate P value?       | Exact        |
| P value summary                     | ****         |
| Significantly different (P < 0.05)? | Yes          |
| One- or two-tailed P value?         | Two-tailed   |
| Sum of ranks in column A,B          | 45 , 126     |
| Difference between medians          |              |
| Median of column A                  | 0.1585, n=9  |
| Median of column B                  | 5.044, n=9   |
| Difference: Actual                  | 4.886        |
| Difference: Hodges-Lehmann          | 4.886        |

|                                     |               |
|-------------------------------------|---------------|
| Fig. 2G                             | AAV2.V59 cDNA |
| Column B                            |               |
| vs.                                 | vs.           |
| Column A                            | AAV2.V5 cDNA  |
| Mann Whitney test                   |               |
| P value                             | 0.6048        |
| Exact or approximate P value?       | Exact         |
| P value summary                     | ns            |
| Significantly different (P < 0.05)? | No            |
| One- or two-tailed P value?         | Two-tailed    |
| Sum of ranks in column A,B          | 79 , 92       |
| Difference between medians          |               |
| Median of column A                  | 5.044, n=9    |
| Median of column B                  | 5.217, n=9    |
| Difference: Actual                  | 0.173         |
| Difference: Hodges-Lehmann          | 0.1687        |

|                                     |             |
|-------------------------------------|-------------|
| Fig. 3G                             |             |
| Column B                            | N496D       |
| vs.                                 | vs.         |
| Column A                            | AAV2        |
| Mann Whitney test                   |             |
| P value                             | <0.0001     |
| Exact or approximate P value?       | Exact       |
| P value summary                     | ****        |
| Significantly different (P < 0.05)? | Yes         |
| One- or two-tailed P value?         | Two-tailed  |
| Sum of ranks in column A,B          | 55 , 155    |
| Mann-Whitney U                      | 0           |
| Difference between medians          |             |
| Median of column A                  | 2.305, n=10 |
| Median of column B                  | 56.50, n=10 |
| Difference: Actual                  | 54.2        |
| Difference: Hodges-Lehmann          | 54.1        |

|                                     |             |
|-------------------------------------|-------------|
| Fig. 3G                             |             |
| Column B                            | N582S       |
| vs.                                 | vs.         |
| Column A                            | AAV2        |
| Mann Whitney test                   |             |
| P value                             | <0.0001     |
| Exact or approximate P value?       | Exact       |
| P value summary                     | ****        |
| Significantly different (P < 0.05)? | Yes         |
| One- or two-tailed P value?         | Two-tailed  |
| Sum of ranks in column A,B          | 55 , 155    |
| Mann-Whitney U                      | 0           |
| Difference between medians          |             |
| Median of column A                  | 2.305, n=10 |
| Median of column B                  | 52.50, n=10 |
| Difference: Actual                  | 50.2        |
| Difference: Hodges-Lehmann          | 50.12       |

|                                     |             |
|-------------------------------------|-------------|
| Fig. 3G                             |             |
| Column B                            | AAV2.V59    |
| vs.                                 | vs.         |
| Column A                            | AAV2        |
| Mann Whitney test                   |             |
| P value                             | <0.0001     |
| Exact or approximate P value?       | Exact       |
| P value summary                     | ****        |
| Significantly different (P < 0.05)? | Yes         |
| One- or two-tailed P value?         | Two-tailed  |
| Sum of ranks in column A,B          | 55 , 155    |
| Mann-Whitney U                      | 0           |
| Difference between medians          |             |
| Median of column A                  | 2.305, n=10 |
| Median of column B                  | 62.00, n=10 |
| Difference: Actual                  | 59.7        |
| Difference: Hodges-Lehmann          | 59.7        |

|                                     |               |
|-------------------------------------|---------------|
| Fig. 3G                             |               |
| Column B                            | N496D         |
| vs.                                 | vs.           |
| Column A                            | N582S         |
| Mann Whitney test                   |               |
| P value                             | 0.9831        |
| Exact or approximate P value?       | Exact         |
| P value summary                     | ns            |
| Significantly different (P < 0.05)? | No            |
| One- or two-tailed P value?         | Two-tailed    |
| Sum of ranks in column A,B          | 104.5 , 105.5 |
| Difference between medians          |               |
| Median of column A                  | 52.50, n=10   |
| Median of column B                  | 56.50, n=10   |
| Difference: Actual                  | 4             |
| Difference: Hodges-Lehmann          | 0.5           |

|                                     |             |
|-------------------------------------|-------------|
| Fig. 3G                             |             |
| Column B                            | N496D       |
| vs.                                 | vs.         |
| Column A                            | AAV2.V59    |
| Mann Whitney test                   |             |
| P value                             | 0.1008      |
| Exact or approximate P value?       | Exact       |
| P value summary                     | ns          |
| Significantly different (P < 0.05)? | No          |
| One- or two-tailed P value?         | Two-tailed  |
| Sum of ranks in column A,B          | 127 , 83    |
| Difference between medians          |             |
| Median of column A                  | 62.00, n=10 |
| Median of column B                  | 56.50, n=10 |
| Difference: Actual                  | -5.5        |
| Difference: Hodges-Lehmann          | -8          |

|                                     |             |
|-------------------------------------|-------------|
| Fig. 3G                             |             |
| Column B                            | N582S       |
| vs.                                 | vs.         |
| Column A                            | AAV2.V59    |
| Mann Whitney test                   |             |
| P value                             | 0.1372      |
| Exact or approximate P value?       | Exact       |
| P value summary                     | ns          |
| Significantly different (P < 0.05)? | No          |
| One- or two-tailed P value?         | Two-tailed  |
| Sum of ranks in column A,B          | 125 , 85    |
| Difference between medians          |             |
| Median of column A                  | 62.00, n=10 |
| Median of column B                  | 52.50, n=10 |
| Difference: Actual                  | -9.5        |
| Difference: Hodges-Lehmann          | -9          |

|                                     |                   |
|-------------------------------------|-------------------|
| Column B                            | AAV-NP59          |
| vs.                                 | vs.               |
| Column A                            | AAV2              |
| Mann Whitney test                   |                   |
| P value                             | 0.0079            |
| Exact or approximate P value?       | Exact             |
| P value summary                     | **                |
| Significantly different (P < 0.05)? | Yes               |
| One- or two-tailed P value?         | Two-tailed        |
| Sum of ranks in column A,B          | 15 , 40           |
| Difference between medians          |                   |
| Median of column A                  | 24497162657, n=5  |
| Median of column B                  | 419477000000, n=5 |
| Difference: Actual                  | 3.9498E+1         |
| Difference: Hodges-Lehmann          | 3.9498E+1         |

|                                     |                   |
|-------------------------------------|-------------------|
| Column B                            | AAV2.V59          |
| vs.                                 | vs.               |
| Column A                            | AAV2              |
| Mann Whitney test                   |                   |
| P value                             | 0.0079            |
| Exact or approximate P value?       | Exact             |
| P value summary                     | **                |
| Significantly different (P < 0.05)? | Yes               |
| One- or two-tailed P value?         | Two-tailed        |
| Sum of ranks in column A,B          | 15 , 40           |
| Difference between medians          |                   |
| Median of column A                  | 24497162657, n=5  |
| Median of column B                  | 253160000000, n=5 |
| Difference: Actual                  | 2.28663E+1        |
| Difference: Hodges-Lehmann          | 2.28663E+1        |

|                                     |                   |
|-------------------------------------|-------------------|
| Column B                            | AAV2.V59          |
| vs.                                 | vs.               |
| Column A                            | AAV-NP59          |
| Mann Whitney test                   |                   |
| P value                             | 0.0952            |
| Exact or approximate P value?       | Exact             |
| P value summary                     | ns                |
| Significantly different (P < 0.05)? | No                |
| One- or two-tailed P value?         | Two-tailed        |
| Sum of ranks in column A,B          | 36 , 19           |
| Difference between medians          |                   |
| Median of column A                  | 419477000000, n=5 |
| Median of column B                  | 253160000000, n=5 |
| Difference: Actual                  | -1.66317E+1       |
| Difference: Hodges-Lehmann          | -1.66317E+1       |
